# Supplementary material for: Overexpression of FAM83H-AS1 indicates poor patient survival and knockdown impairs cell proliferation and invasion via MET/EGFR signaling in lung cancer
Source: PubMed Central journal article supplement (PMC5309882; doi:10.1038/srep42819), 2017-02-15
Supplement: srep42819-s1.pdf [file srep42819-s1.pdf]

# Overexpression of *FAM83H-AS1* indicates poor patient survival and knockdown impairs cell proliferation and invasion via MET/EGFR signaling in lung cancer

Jie Zhang<sup>1,2</sup>, Shumei Feng<sup>3</sup>, Wenmei Su<sup>4</sup>, Shengbin Bai<sup>3</sup>, Lei Xiao<sup>3</sup>, Lihui Wang<sup>5</sup>, Dafydd G. Thomas<sup>6</sup>, Jules Lin<sup>2</sup>, Rishindra M. Reddy<sup>2</sup>, Philip W. Carrott, Jr.<sup>2</sup>, William R. Lynch<sup>2</sup>, Andrew C. Chang<sup>2</sup>, David G. Beer<sup>2</sup>, You-min Guo<sup>1</sup>, Guoan Chen<sup>2</sup>

<sup>1</sup>Xian Jiaotong University, Xi'an, China; <sup>2</sup>Department of Surgery, University of Michigan, Ann Arbor, Michigan, USA; <sup>3</sup>Xinjiang Medical University, Urumqi, China; <sup>4</sup>Guangdong Medical University, Zhanjiang, China; <sup>5</sup>Guangxi Medical University, Nanning, China; <sup>6</sup>Department of Pathology, University of Michigan

Supplementary data

2 Tables

7 figures

**Supplementary Table 1.** *FAM83H-AS1* expression and clinical variables from validation set of lung ADs measured by qRT-PCR

| <b>Variables</b> | <b>AD</b> | <b>FAM83H-AS1</b> | <b><i>P</i> value*</b> |
|------------------|-----------|-------------------|------------------------|
| Age              |           |                   |                        |
| ≤65              | 42        | 1.34              |                        |
| >65              | 59        | 1.7               | 0.6                    |
| Gender           |           |                   |                        |
| Female           | 53(52.5%) | 1.58              |                        |
| Male             | 48        | 1.64              | 0.6                    |
| Stage            |           |                   |                        |
| Stage I          | 59(58.4%) | 1.19              |                        |
| Stage II         | 16        | 2.1               | 0.4                    |
| Stage III        | 26        | 1.69              | 0.8                    |
| N status         |           |                   |                        |
| No               | 70        | 1.48              |                        |
| N1-2             | 31        | 1.89              | 0.8                    |
| Differentiation  |           |                   |                        |
| Well             | 28        | 1.44              |                        |
| Moderate         | 38        | 1.65              | 0.5                    |
| Poor             | 34(33.7%) | 1.48              | 0.5                    |

\*t test was used.

**Supplementary Table 2.** *EGFR*, *KRAS* and *TP53* genes mutation in lung cancer cell lines used in Figure 3B

| Cell Line | Subtype   | EGFR                    | KRAS     | TP53      |
|-----------|-----------|-------------------------|----------|-----------|
| PC-9      | AD        | E746_A750del            | WT       | WT        |
| Hcc4006   | AD        | Del L747-E749           | WT       | WT        |
| H1650     | AD        | E746_A750del            | WT       | WT        |
| H838      | AD        | WT                      | WT, amp? | E62stop   |
| H1975     | AD        | L858R, T790M            | WT       | WT        |
| H1299     | AD        | WT                      | WT       | truncated |
| H727      | carcinoid | ?                       | ?        | ?         |
| H358      | AD        | WT                      | G12C     | WT        |
| H441      | AD        | WT                      | G12V     | R158L     |
| SK-MES-1  | NSCLC     | WT                      | WT       | E298stop  |
| H2228     | AD        | WT                      | WT       | Q331stop  |
| HCC827    | AD        | Del E746-A750, EGFR amp | WT       | WT        |

Note: H2228 cell line has *EML4-ALK* fusion gene; Amp: DNA amplification; del: deletion.

## Supplementary Figure 1

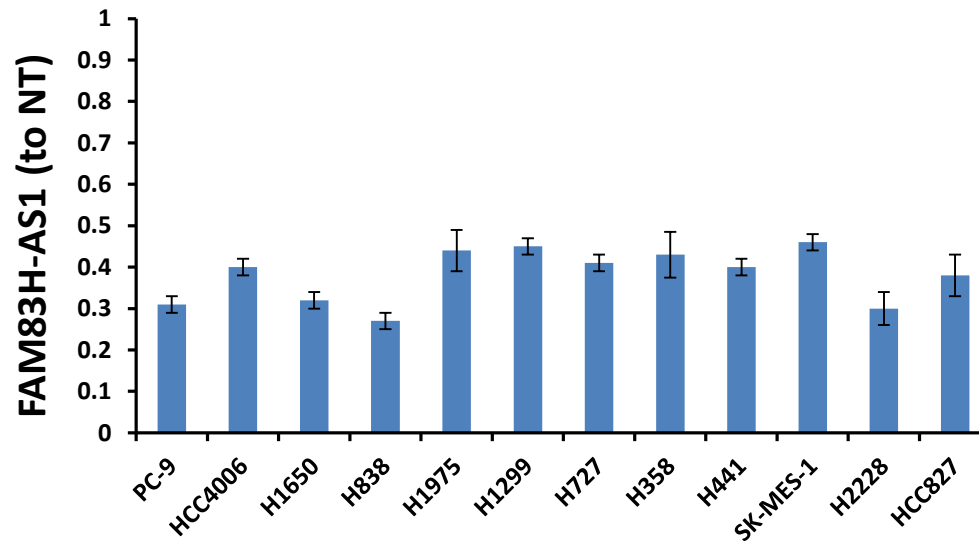

The knockdown efficiency of FAM83H-AS1 siRNA smartpool (10nM, 48 hrs) on 12 lung cancer cell lines used in this study on Figure 3B. (ACTB as mRNA loading control, all values are relative to NT control, NT=1)

## Supplementary Figure 2

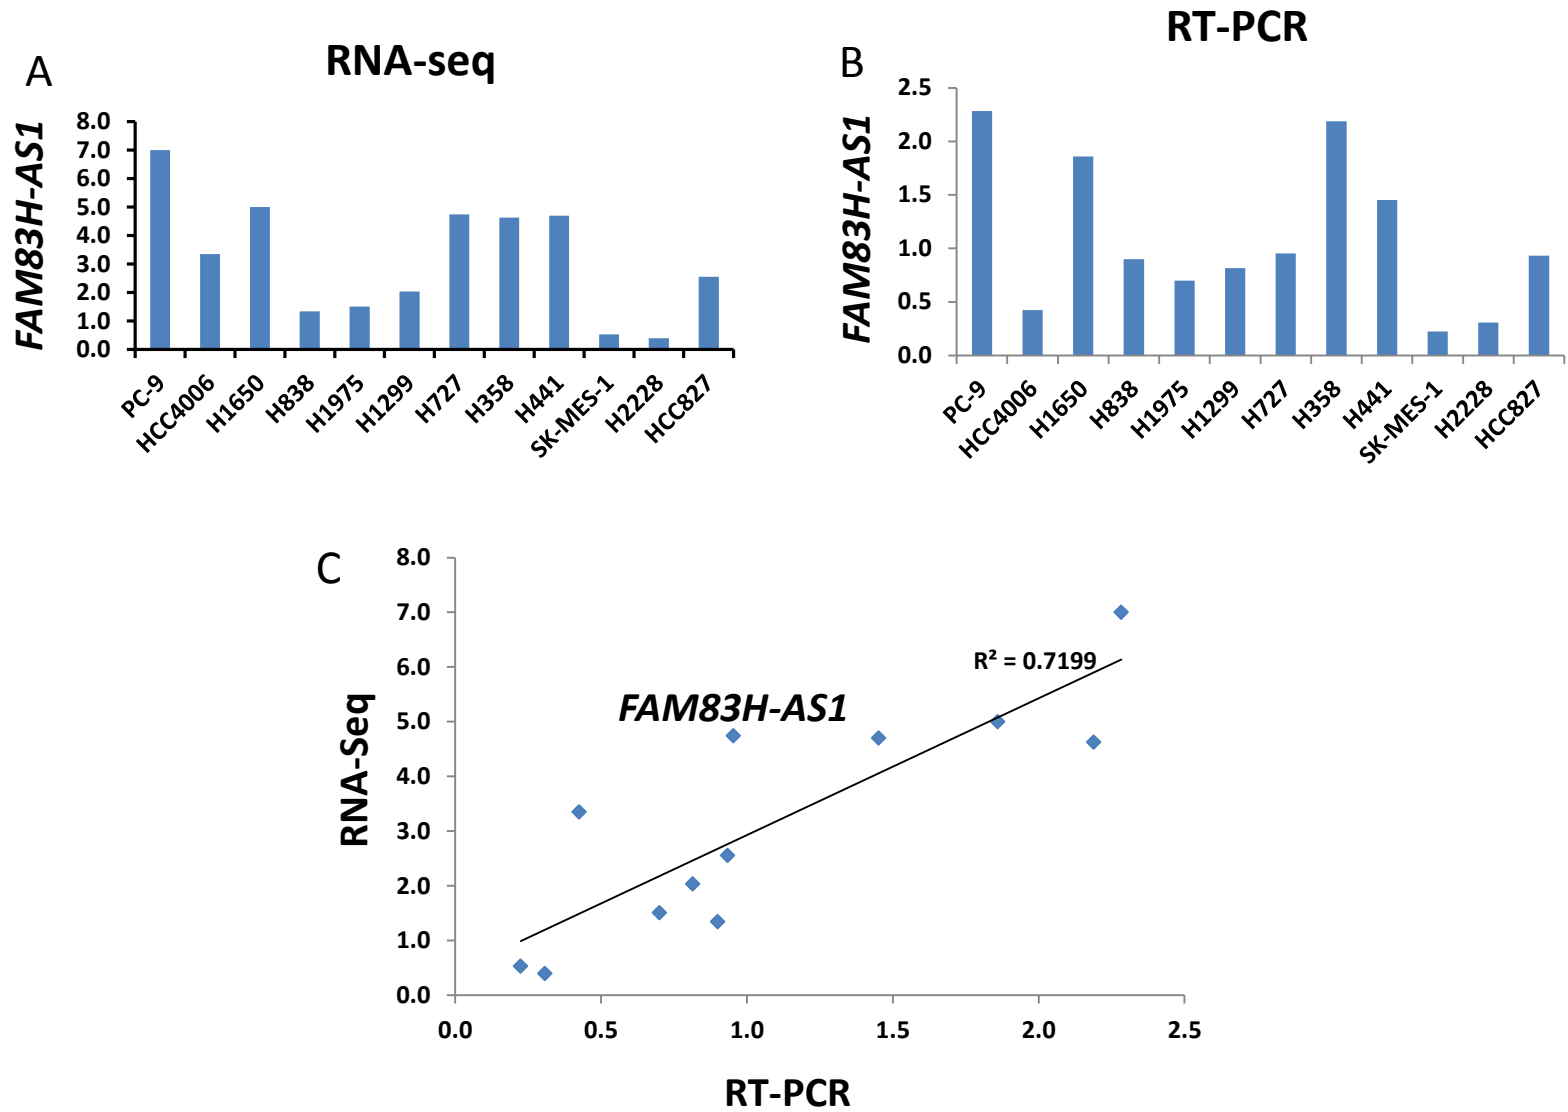

*FAM83H-AS1* expression in 12 lung cancer cell lines used in this study showing in Figure 3B. **A**, RNA-Seq data showing *FAM83H-AS1* expression (log<sub>2</sub> of FPKM value); **B**, RT-PCR validation of *FAM83H-AS1* expression (relative to median value of 12 cells); **C**, correlation between RT-PCR and RNA-Seq values in these 12 cell lines ( $r = 0.72$ ,  $p = 0.004$ ).

### Supplementary Figure 3

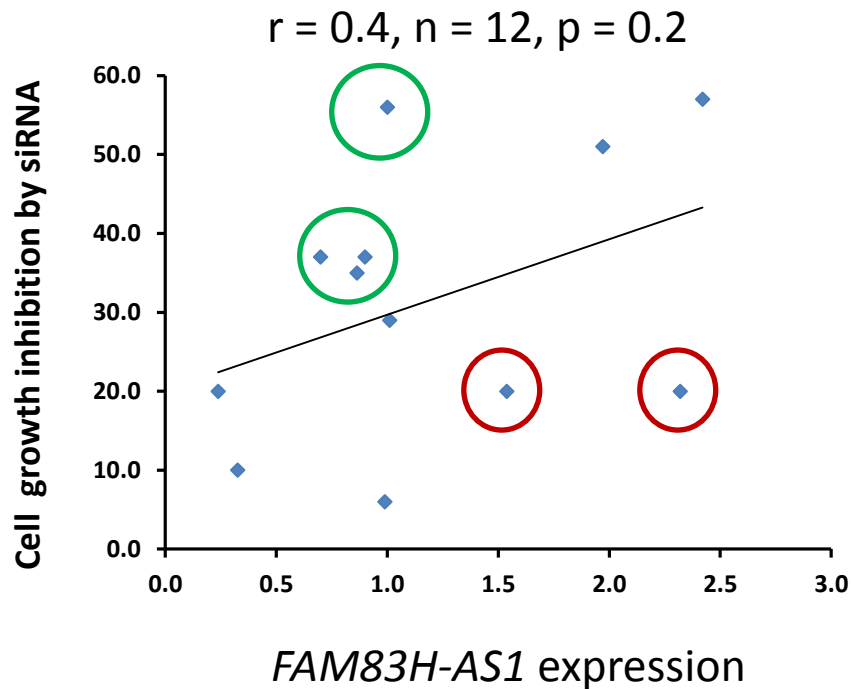

The correlation between *FAM83H-AS1* expression and rate of cell growth inhibition by *FAM83H-AS1* knockdown using siRNA. The cell growth in some cells (indicated by red cycle) were not affected by *FAM83H-AS1* siRNA knockdown although these cells have relative higher level of *FAM83H-AS1* expression. Whereas, cell growth in some cells (H838, H1299 and H1975) were affected by *FAM83H-AS1* siRNA knockdown although these cells have relative low level of *FAM83H-AS1* expression.

## Supplementary Figure 4

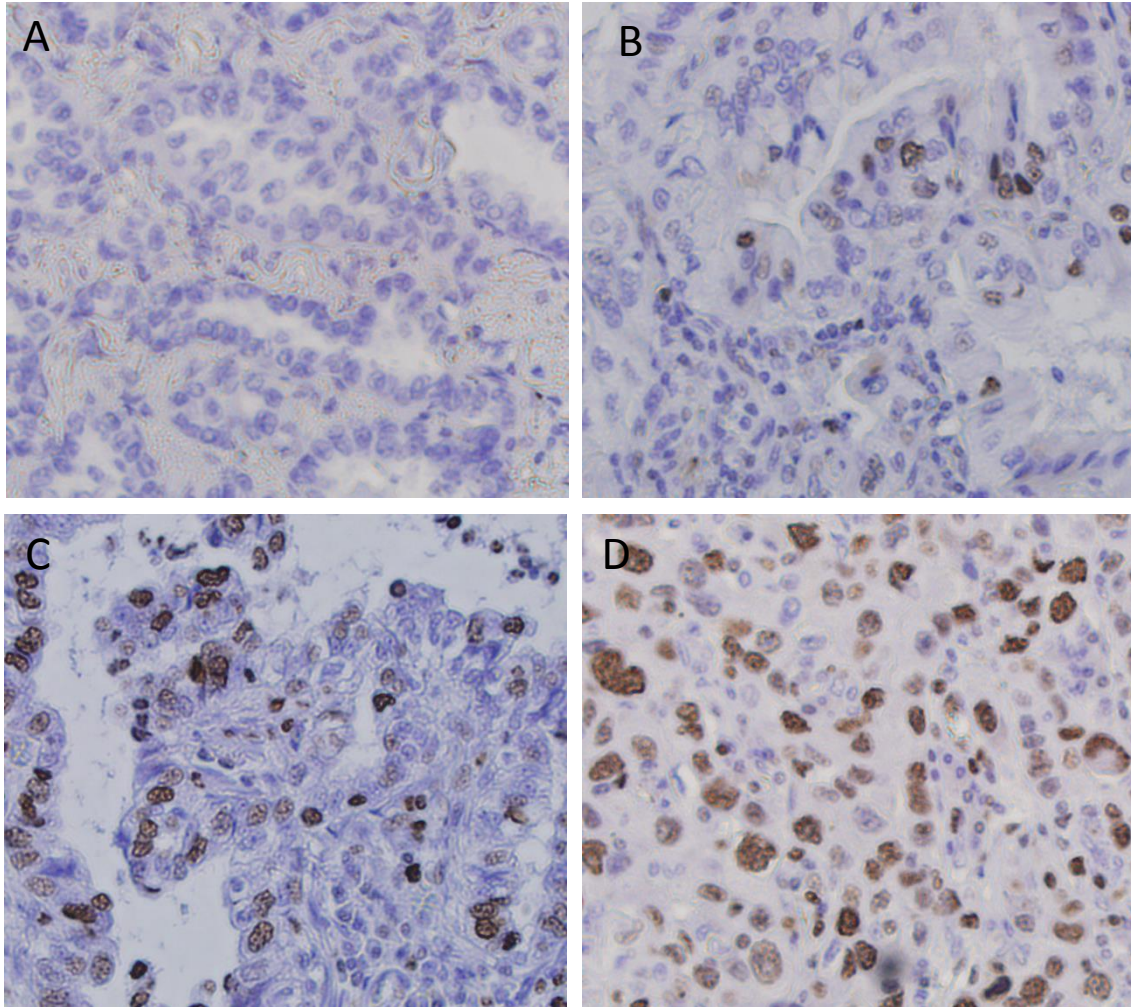

Ki-67 immunohistochemistry (IHC) staining on 97 lung cancer tissue array. Ki-67 staining was scored as 0 (negative, A), 1 (<10% positive cells, B), 2 (10-50% positive cells, C), or 3 (>50% positive cells, D).





## Supplementary Figure 6

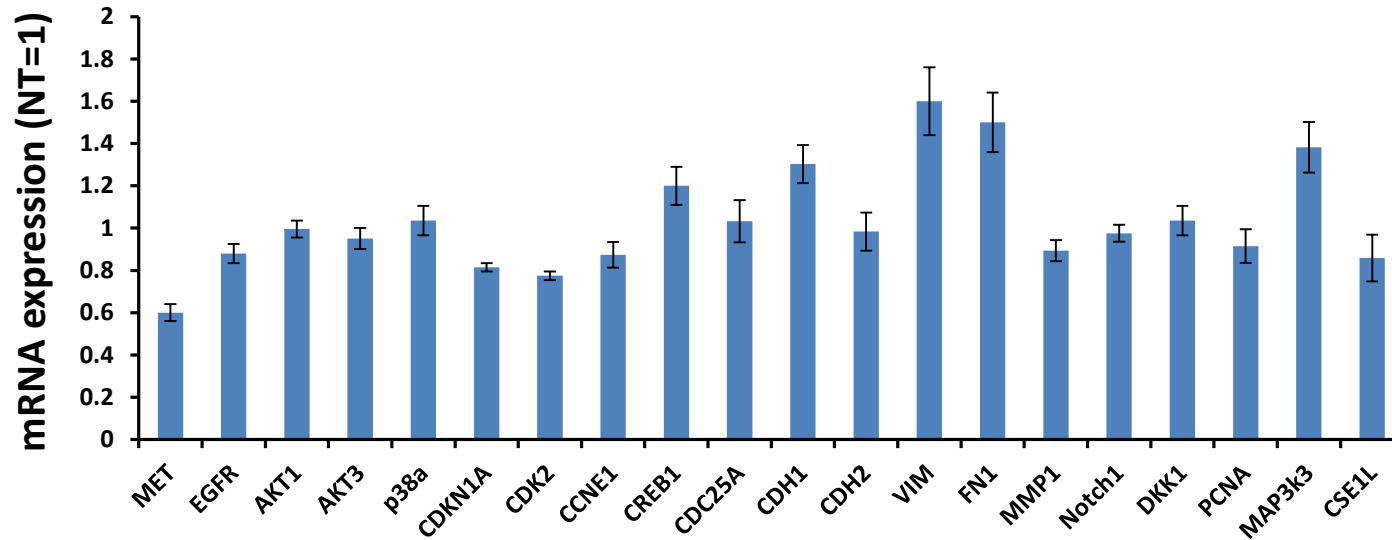

RT-PCR indicated the change in gene (mRNAs) expression after *FAM83H-AS1* siRNA (10nM) treatment at 48 hrs on PC-9 cell. MET mRNA was decreased by 40%, other genes were not affected. (ACTB as mRNA loading control, all values are relative to NT control).

## Supplementary Figure 7

464 LUAD

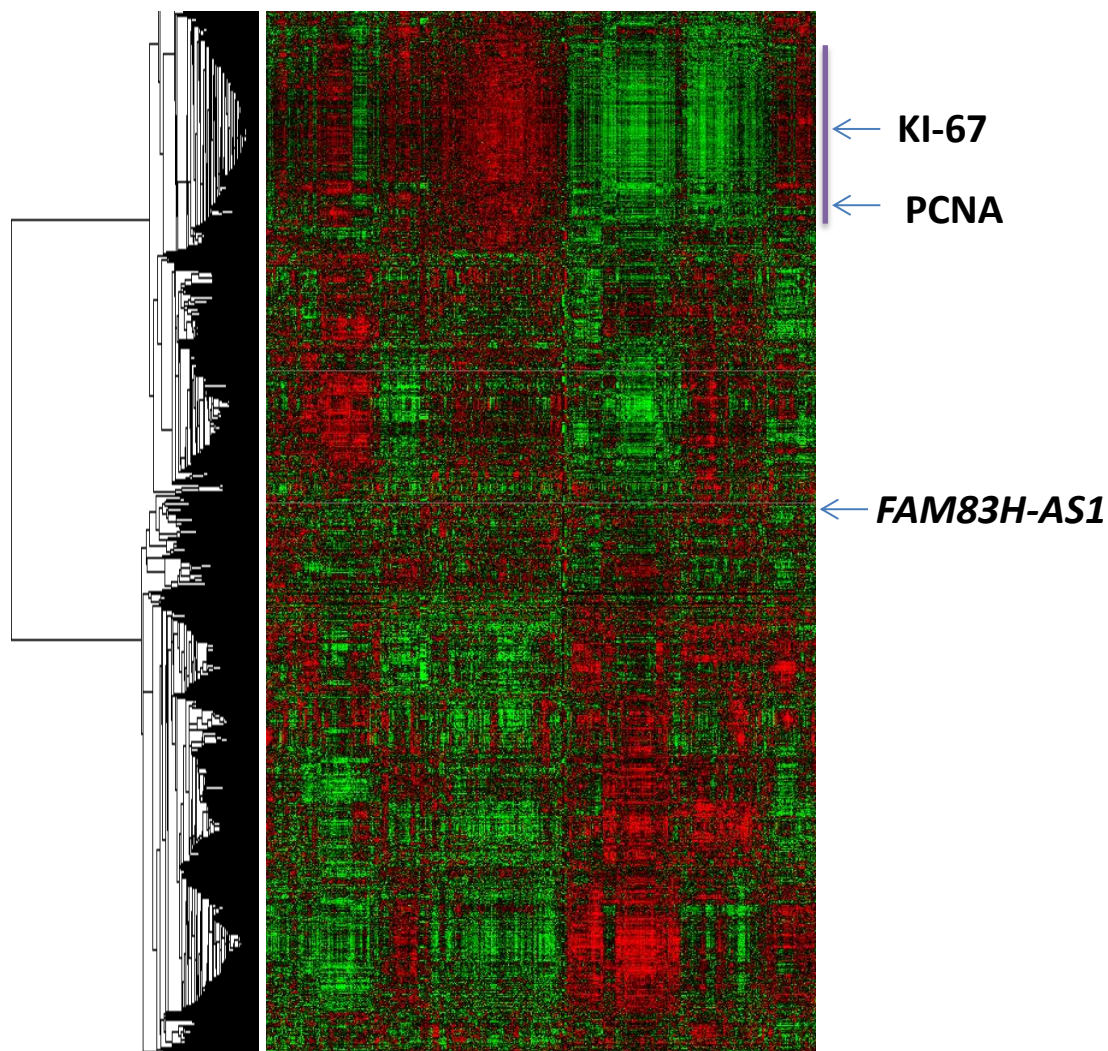

Heat maps of cluster analysis showing 868 proliferation related genes (downloaded from Ben-Porath, Nat. Gent. 2008) together with *FAM83H-AS1* from 464 lung ADs (UM 67, Seo 85 and TCGA 312) RNA-Seq data. Columns represent samples, and rows genes, red is high expression and green low expression. Heat map showing that about 2/3 LUADs have a higher Ki-67 expression and other 1/3 tumors were presented by other proliferation genes. Regarding the proliferation related genes, KI-67 only represented a small subset of these proliferation related genes. Most of the proliferation related genes are not cluster with Ki-67 or PCNA.
